# Supplementary material for: Natural variation in the sequestosome-related gene, sqst-5, underlies zinc homeostasis in Caenorhabditis elegans
Source: PubMed Central journal article supplement (PMC7682890; doi:10.1371/journal.pgen.1008986), 2020-11-11

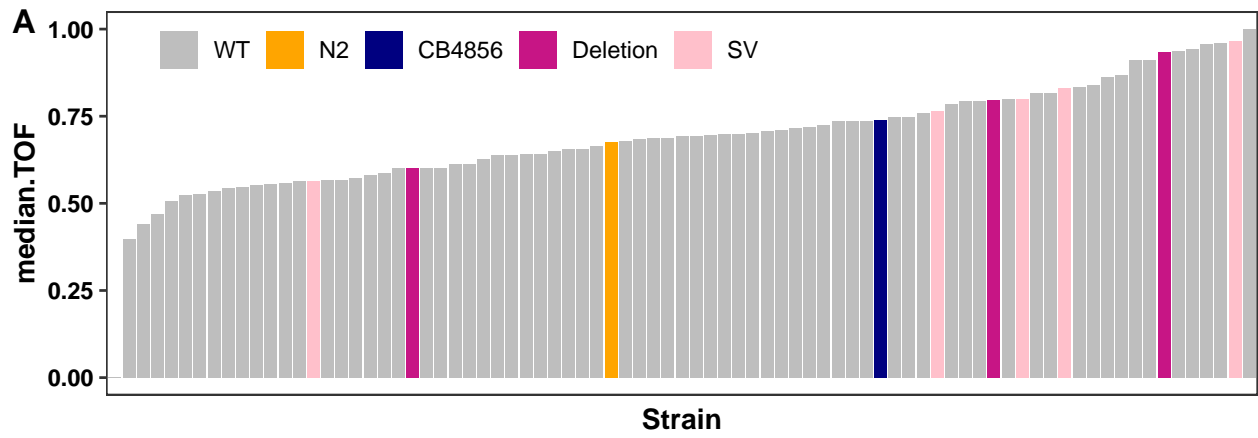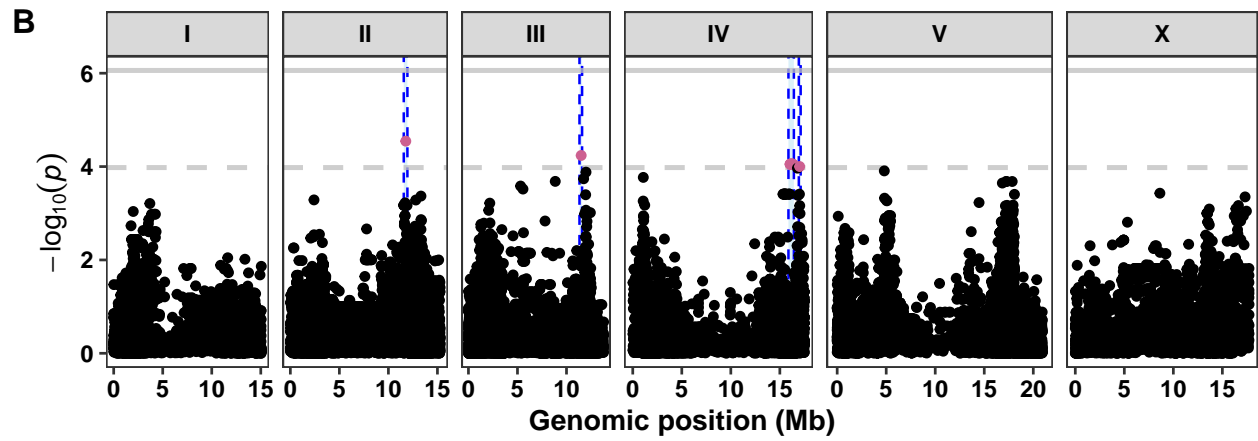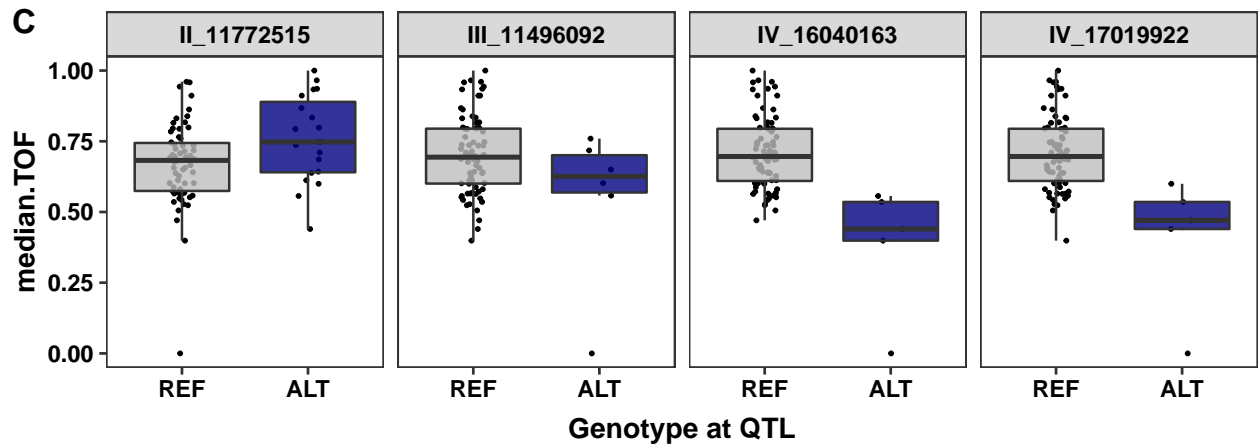

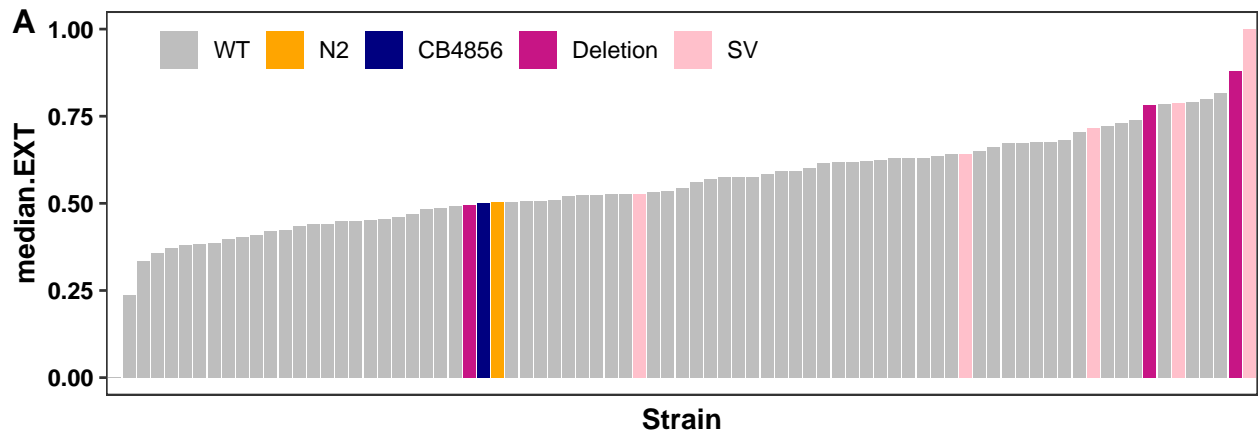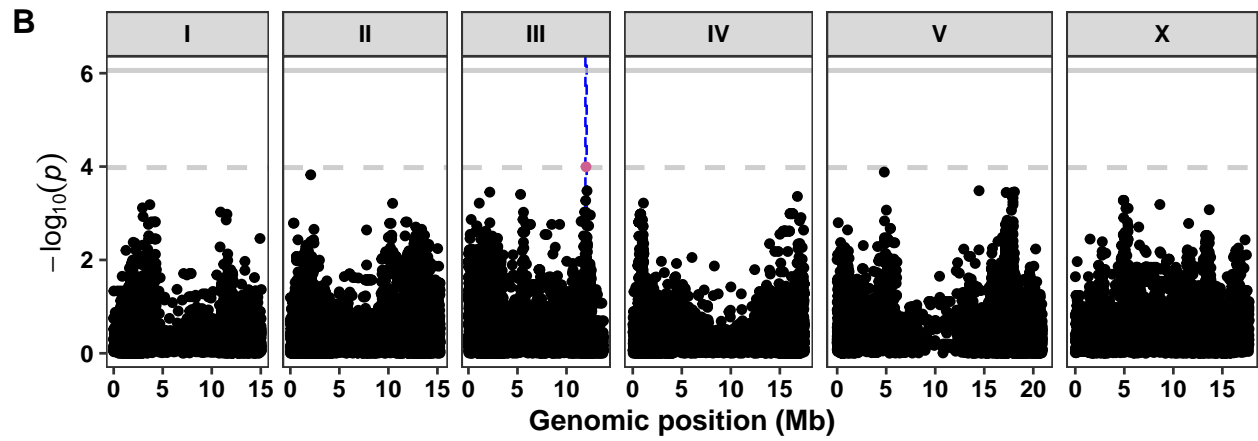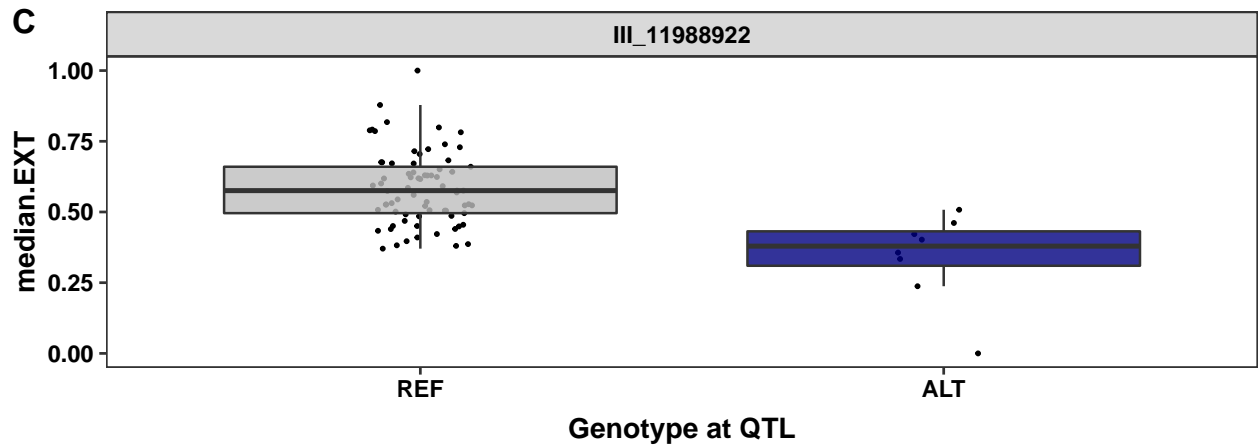

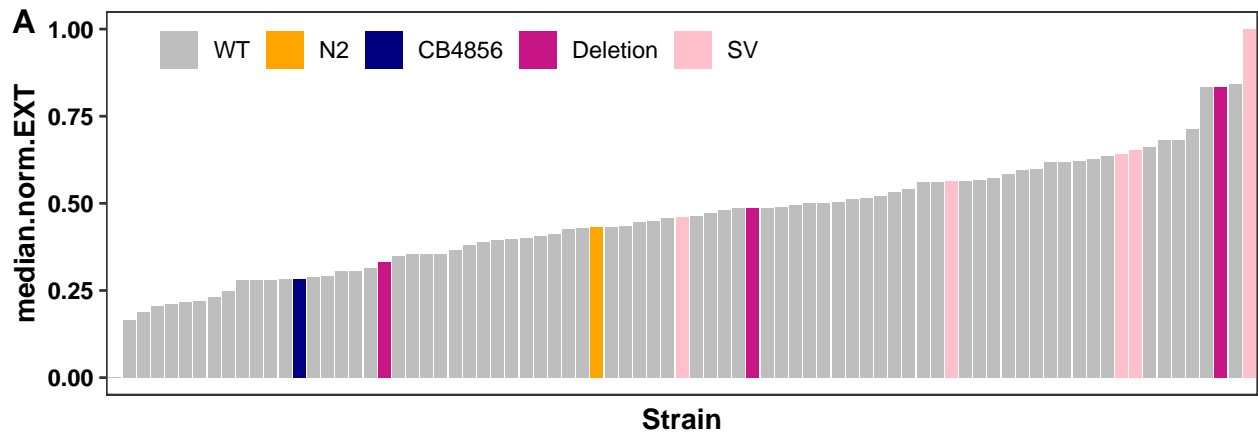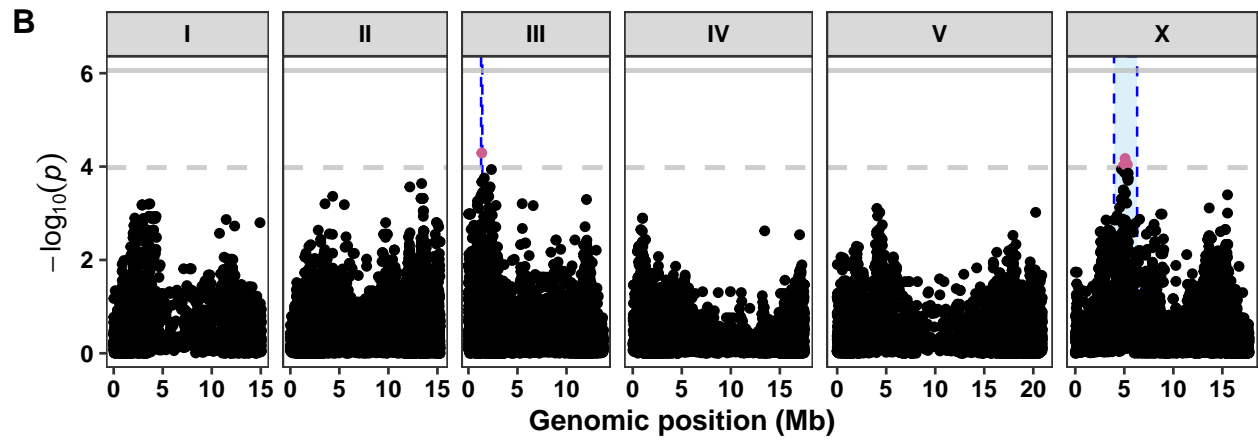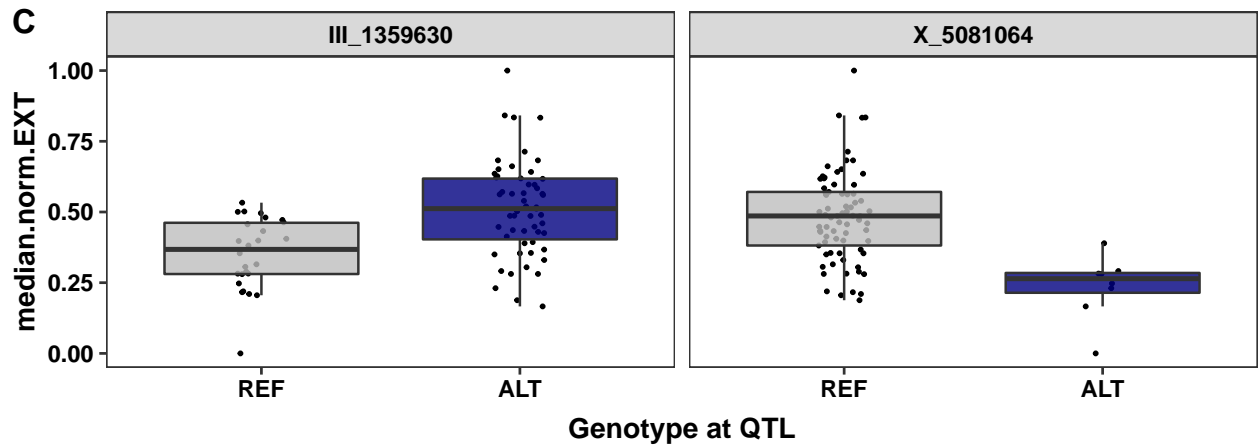

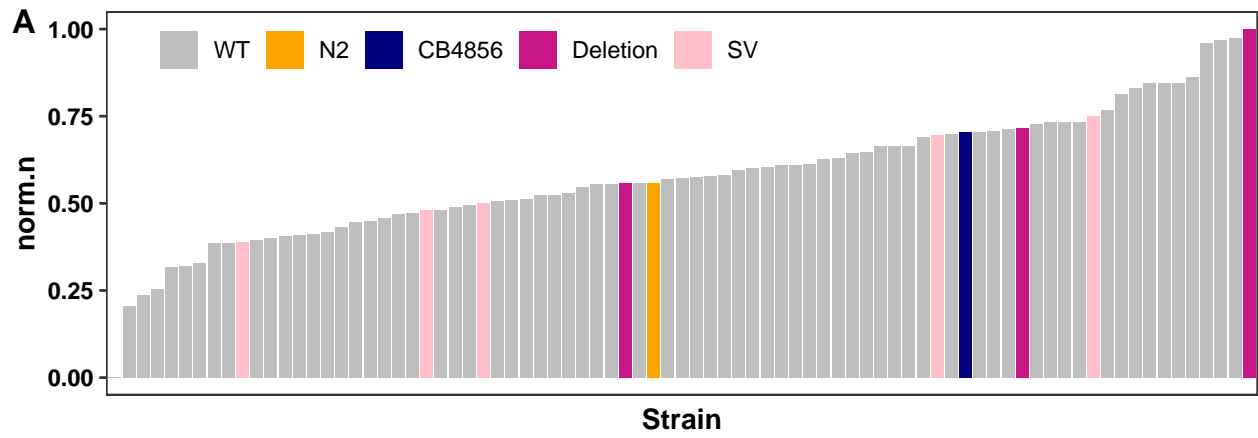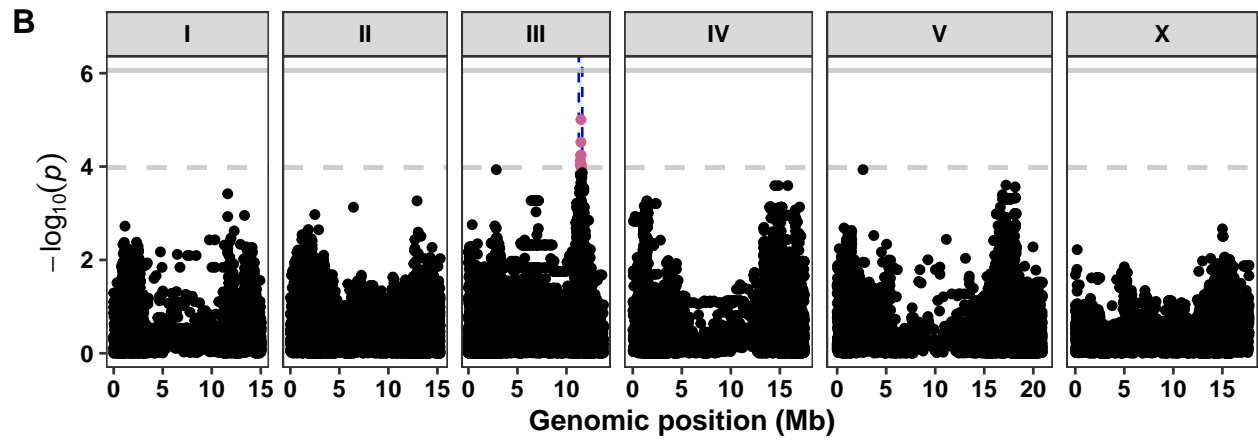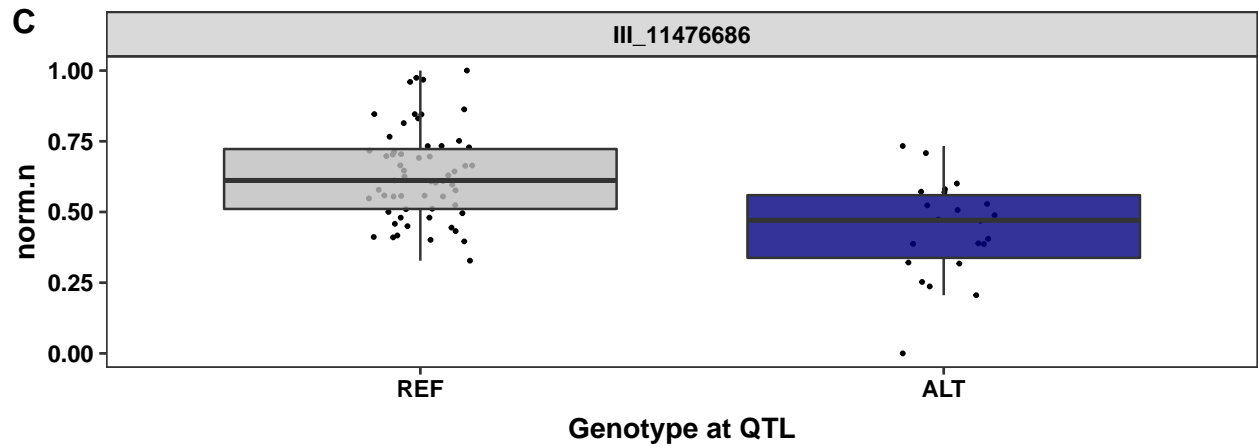

Supplement: pgen.1008986.s013.pdf [file pgen.1008986.s013.pdf]
